# Supplementary material for: Elephant megacarcasses increase local nutrient pools in African savanna soils and plants
Source: Copernicus journal article supplement (doi:10.5194/egusphere-2024-1514), 2024-05-30
Supplement: Supplementary file 1 [file egusphere-2024-1514-supplement.pdf]

**SUPPLEMENTAL MATERIALS**

**Table S1.** Generalized linear mixed model results for soil variables. The same five models were run for each response variable, including a null model, and each included site as a random effect to account for repeat measurements. AICc is Akaike’s Information Criterion, and  $\Delta$ AICc is the difference between a given model and the best fit model for that response variable. Cum.Wt stand for cumulative weight; it gives the sum of Akaike’s weights and indicates the likelihood that the models up to that point are the best in the set. Models with a  $\Delta$ AICc value of 2 are considered roughly equivalent in fit and are italicized. R<sup>2</sup> is the proportion of variance explained by a model. Coefficients ( $\pm$  standard error) are shown for each predictor and model. Rows are organized in blocks by response variable. Within blocks, models are listed in order of increasing  $\Delta$ AICc.

| Model                     | Model Fit |               |         |                | Coefficients $\pm$ SE |                  |                             |
|---------------------------|-----------|---------------|---------|----------------|-----------------------|------------------|-----------------------------|
|                           | AICc      | $\Delta$ AICc | Cum. Wt | R <sup>2</sup> | Soil Type             | Distance         | Soil Type $\times$ Distance |
| <b>Log Nitrogen (%)</b>   |           |               |         |                |                       |                  |                             |
| <i>Soil</i>               | 19.08     | 0.00          | 0.63    | 0.34           | -0.47 $\pm$ 0.17      |                  |                             |
| <i>Null</i>               | 20.88     | 1.80          | 0.89    |                |                       |                  |                             |
| Soil $\times$ Distance    | 23.70     | 4.61          | 0.95    | 0.41           | -0.26 $\pm$ 0.18      | 0.00 $\pm$ 0.01  | -0.03 $\pm$ 0.01            |
| Soil + Distance           | 25.00     | 5.91          | 0.99    | 0.36           | -0.47 $\pm$ 0.17      | -0.01 $\pm$ 0.01 |                             |
| Distance                  | 26.69     | 7.60          | 1.00    | 0.03           |                       | -0.01 $\pm$ 0.01 |                             |
| <b>Log Nitrate (mg/L)</b> |           |               |         |                |                       |                  |                             |
| <i>Distance</i>           | 156.31    | 0.00          | 0.54    | 0.17           |                       | -0.08 $\pm$ 0.03 |                             |
| <i>Null</i>               | 157.99    | 1.68          | 0.77    |                |                       |                  |                             |
| Soil + Distance           | 158.80    | 2.49          | 0.92    | 0.17           | -0.20 $\pm$ 0.35      | -0.08 $\pm$ 0.03 |                             |
| Soil                      | 160.37    | 4.06          | 0.99    | 0.01           | -0.20 $\pm$ 0.34      |                  |                             |
| Soil $\times$ Distance    | 165.49    | 9.17          | 1.00    | 0.17           | -0.18 $\pm$ 0.47      | -0.08 $\pm$ 0.04 | 0.00 $\pm$ 0.05             |
| <b>Log <sup>15</sup>N</b> |           |               |         |                |                       |                  |                             |
| <i>Distance</i>           | 5.79      | 0.00          | 0.60    | 0.28           |                       | -0.03 $\pm$ 0.00 |                             |
| <i>Soil + Distance</i>    | 6.73      | 0.94          | 0.98    | 0.43           | 0.26 $\pm$ 0.12       | -0.03 $\pm$ 0.00 |                             |
| Soil $\times$ Distance    | 12.28     | 6.50          | 1.00    | 0.45           | 0.38 $\pm$ 0.13       | -0.02 $\pm$ 0.01 | -0.02 $\pm$ 0.01            |

|                                               |        |       |      |      |                  |              |               |
|-----------------------------------------------|--------|-------|------|------|------------------|--------------|---------------|
| Null                                          | 26.60  | 20.82 | 1.00 |      |                  |              |               |
| Soil                                          | 27.43  | 21.65 | 1.00 | 0.16 | 0.26 ± 0.12      |              |               |
| <b>Log Ammonium (mg/L)</b>                    |        |       |      |      |                  |              |               |
| <i>Soil + Distance</i>                        | 213.21 | 0.00  | 0.85 | 0.39 | 2.33 ± 0.94      | -0.21 ± 0.04 |               |
| Distance                                      | 217.51 | 4.30  | 0.95 | 0.19 |                  | -0.21 ± 0.04 |               |
| Soil × Distance                               | 218.91 | 5.70  | 1.00 | 0.39 | 2.25 ± 1.09      | -0.22 ± 0.06 | 0.01 ± 0.08   |
| Soil                                          | 226.54 | 13.32 | 1.00 | 0.20 | 2.33 ± 0.94      |              |               |
| Null                                          | 230.94 | 17.73 | 1.00 |      |                  |              |               |
| <b>Log Phosphate (mg/L)</b>                   |        |       |      |      |                  |              |               |
| <i>Soil × Distance</i>                        | 253.62 | 0.00  | 0.89 | 0.28 | 2.42 ± 1.57      | 0.10 ± 0.11  | -0.60 ± 0.16  |
| Soil                                          | 259.48 | 5.86  | 0.94 | 0.03 | -1.21 ± 1.31     |              |               |
| Null                                          | 260.31 | 6.69  | 0.97 |      |                  |              |               |
| Soil + Distance                               | 261.40 | 7.77  | 0.99 | 0.09 | -1.31 ± 1.27     | -0.18 ± 0.09 |               |
| Distance                                      | 262.26 | 8.64  | 1.00 | 0.06 |                  | -0.17 ± 0.09 |               |
| <b>Log Plant Available Phosphorus (mg/kg)</b> |        |       |      |      |                  |              |               |
| <i>Soil + Distance</i>                        | 219.05 | 0.00  | 0.35 | 0.18 | -1.41 ± 0.99     | -0.14 ± 0.04 |               |
| <i>Soil × Distance</i>                        | 219.64 | 0.59  | 0.61 | 0.23 | -0.16 ± 1.13     | -0.04 ± 0.06 | -0.19 ± 0.08  |
| <i>Distance</i>                               | 220.38 | 1.33  | 0.79 | 0.10 |                  | -0.14 ± 0.04 |               |
| <i>Soil</i>                                   | 220.90 | 1.85  | 0.93 | 0.09 | -1.41 ± 0.99     |              |               |
| Null                                          | 222.33 | 3.28  | 1.00 |      |                  |              |               |
| <b>Log Sodium (mg/kg)</b>                     |        |       |      |      |                  |              |               |
| <i>Distance</i>                               | 74.12  | 0.00  | 0.79 | 0.19 |                  | -0.05 ± 0.01 |               |
| Soil + Distance                               | 77.17  | 3.05  | 0.96 | 0.18 | -0.09 ± 0.29     | -0.05 ± 0.01 |               |
| Soil × Distance                               | 80.16  | 6.04  | 1.00 | 0.22 | 0.19 ± 0.31      | -0.03 ± 0.01 | -0.04 ± 0.02  |
| Null                                          | 85.14  | 11.02 | 1.00 |      |                  |              |               |
| Soil                                          | 88.09  | 13.97 | 1.00 | 0.01 | -0.09 ± 0.29     |              |               |
| <b>Potassium (mg/kg)</b>                      |        |       |      |      |                  |              |               |
| <i>Soil × Distance</i>                        | 648.62 | 0.00  | 0.99 | 0.16 | -462.26 ± 422.97 | 5.36 ± 4.68  | -17.82 ± 6.63 |
| Soil + Distance                               | 658.44 | 9.81  | 1.00 | 0.16 | -578.09 ± 420.78 | -3.55 ± 3.57 |               |
| Soil                                          | 661.33 | 12.71 | 1.00 | 0.16 | -578.10 ± 420.80 |              |               |
| Distance                                      | 671.73 | 23.11 | 1.00 | 0.00 |                  | -3.55 ± 3.57 |               |
| Null                                          | 674.74 | 26.11 | 1.00 |      |                  |              |               |
| <b>Log Calcium (mg/kg)</b>                    |        |       |      |      |                  |              |               |
| <i>Soil</i>                                   | -0.60  | 0.00  | 0.98 | 0.64 | -1.47 ± 0.34     |              |               |
| Null                                          | 7.51   | 8.11  | 1.00 |      |                  |              |               |
| Soil + Distance                               | 10.89  | 11.50 | 1.00 | 0.64 | -1.47 ± 0.34     | 0.00 ± 0.00  |               |
| Distance                                      | 18.90  | 19.51 | 1.00 | 0.00 |                  | 0.00 ± 0.00  |               |
| Soil × Distance                               | 21.03  | 21.63 | 1.00 | 0.64 | -1.44 ± 0.34     | 0.00 ± 0.01  | 0.00 ± 0.01   |

| <b>Log Iron (mg/kg)</b>      |        |       |      |      |              |             |              |
|------------------------------|--------|-------|------|------|--------------|-------------|--------------|
| <i>Soil</i>                  | -36.74 | 0.00  | 0.99 | 0.73 | -1.22 ± 0.23 |             |              |
| Null                         | -26.64 | 10.10 | 1.00 |      |              |             |              |
| Soil + Distance              | -24.28 | 12.45 | 1.00 | 0.73 | -1.22 ± 0.23 | 0.00 ± 0.00 |              |
| Distance                     | -14.30 | 22.44 | 1.00 | 0.00 |              | 0.00 ± 0.00 |              |
| Soil × Distance              | -13.79 | 22.95 | 1.00 | 0.73 | -1.19 ± 0.23 | 0.00 ± 0.00 | 0.00 ± 0.01  |
| <b>Log Magnesium (mg/kg)</b> |        |       |      |      |              |             |              |
| <i>Soil</i>                  | -18.70 | 0.00  | 0.99 | 0.71 | -1.53 ± 0.30 |             |              |
| Null                         | -8.76  | 9.94  | 1.00 |      |              |             |              |
| Soil + Distance              | -6.52  | 12.18 | 1.00 | 0.71 | -1.53 ± 0.30 | 0.00 ± 0.00 |              |
| Soil × Distance              | 2.65   | 21.35 | 1.00 | 0.71 | -1.48 ± 0.30 | 0.00 ± 0.00 | -0.01 ± 0.01 |
| Distance                     | 3.32   | 22.01 | 1.00 | 0.00 |              | 0.00 ± 0.00 |              |
| <b>Log Water (mmol/mol)</b>  |        |       |      |      |              |             |              |
| <i>Soil</i>                  | 110.41 | 0.00  | 0.52 | 0.16 | 0.65 ± 0.36  |             |              |
| <i>Null</i>                  | 110.83 | 0.42  | 0.94 |      |              |             |              |
| Soil + Distance              | 116.00 | 5.59  | 0.97 | 0.19 | 0.65 ± 0.36  | 0.03 ± 0.01 |              |
| Distance                     | 116.31 | 5.90  | 1.00 | 0.03 |              | 0.03 ± 0.01 |              |
| Soil × Distance              | 123.56 | 13.15 | 1.00 | 0.19 | 0.74 ± 0.41  | 0.03 ± 0.02 | -0.01 ± 0.03 |

14 **Table S2.** Generalized linear mixed model results for leaf variables. The same five models were  
 15 run for each response variable, including a null model, and each included site as a random effect  
 16 to account for repeat measurements. AICc is Akaike’s Information Criterion, and  $\Delta$ AICc is the  
 17 difference between a given model and the best fit model for that response variable. Cum.Wt  
 18 stand for cumulative weight; it gives the sum of Akaike’s weights and indicates the likelihood  
 19 that the models up to that point are the best in the set. Models with a  $\Delta$ AICc value of 2 are  
 20 considered roughly equivalent in fit and are italicized.  $R^2$  is the proportion of variance explained  
 21 by a model. Coefficients ( $\pm$  standard error) are shown for each predictor and model. Rows are  
 22 organized in blocks by response variable. Within blocks, models are listed in order of increasing  
 23  $\Delta$ AICc.

| Model                          | Model Fit |               |         |       | Coefficients $\pm$ SE |                  |                             |
|--------------------------------|-----------|---------------|---------|-------|-----------------------|------------------|-----------------------------|
|                                | AICc      | $\Delta$ AICc | Cum. Wt | $R^2$ | Soil Type             | Distance         | Soil Type $\times$ Distance |
| <b>Log Nitrogen (%)</b>        |           |               |         |       |                       |                  |                             |
| <i>Distance</i>                | 0.04      | 0.00          | 0.86    | 0.34  |                       | -0.03 $\pm$ 0.00 |                             |
| Soil + Distance                | 3.73      | 3.69          | 1.00    | 0.37  | 0.13 $\pm$ 0.11       | -0.03 $\pm$ 0.00 |                             |
| Soil $\times$ Distance         | 13.81     | 13.77         | 1.00    | 0.37  | 0.15 $\pm$ 0.13       | -0.03 $\pm$ 0.01 | 0.00 $\pm$ 0.01             |
| Null                           | 18.12     | 18.08         | 1.00    |       |                       |                  |                             |
| Soil                           | 22.31     | 22.27         | 1.00    | 0.03  | 0.10 $\pm$ 0.10       |                  |                             |
| <b>Log <math>^{15}</math>N</b> |           |               |         |       |                       |                  |                             |
| <i>Distance</i>                | 75.08     | 0.00          | 0.67    | 0.36  |                       | -0.09 $\pm$ 0.01 |                             |
| Soil + Distance                | 75.80     | 2.72          | 0.84    | 0.35  | -0.10 $\pm$ 0.35      | -0.09 $\pm$ 0.01 |                             |
| Soil $\times$ Distance         | 77.96     | 2.88          | 1.00    | 0.37  | -0.49 $\pm$ 0.38      | -0.11 $\pm$ 0.01 | 0.06 $\pm$ 0.02             |
| Null                           | 108.18    | 33.10         | 1.00    |       |                       |                  |                             |
| Soil                           | 110.55    | 35.47         | 1.00    | 0.01  | -0.18 $\pm$ 0.37      |                  |                             |
| <b>Phosphorus (%)</b>          |           |               |         |       |                       |                  |                             |
| <i>Null</i>                    | -57.76    | 0.00          | 0.79    |       |                       |                  |                             |
| Soil                           | -55.08    | 2.68          | 1.00    | 0.18  | -0.15 $\pm$ 0.09      |                  |                             |
| Distance                       | -45.22    | 12.54         | 1.00    | 0.00  |                       | 0.00 $\pm$ 0.00  |                             |
| Soil $\times$ Distance         | -43.48    | 14.28         | 1.00    | 0.24  | -0.04 $\pm$ 0.09      | 0.01 $\pm$ 0.00* | -0.02 $\pm$ 0.00            |
| Soil + Distance                | -42.43    | 15.33         | 1.00    | 0.18  | -0.15 $\pm$ 0.09      | 0.00 $\pm$ 0.00  |                             |
| <b>Sodium (mg/kg)</b>          |           |               |         |       |                       |                  |                             |

|                          |         |       |      |      |                    |                 |               |
|--------------------------|---------|-------|------|------|--------------------|-----------------|---------------|
| <i>Soil × Distance</i>   | 790.83  | 0.00  | 0.99 | 0.62 | -4989.53 ± 1153.34 | -192.64 ± 50.42 | 59.57 ± 76.04 |
| Soil + Distance          | 799.30  | 8.48  | 1.00 | 0.62 | -4570.16 ± 1015.91 | -166.46 ± 37.59 |               |
| Soil                     | 822.11  | 31.28 | 1.00 | 0.54 | -4723.3 ± 1044.7   |                 |               |
| Distance                 | 823.81  | 32.98 | 1.00 | 0.08 |                    | -167.14 ± 37.61 |               |
| Null                     | 846.86  | 56.03 | 1.00 |      |                    |                 |               |
| <b>Magnesium (mg/kg)</b> |         |       |      |      |                    |                 |               |
| <i>Null</i>              | -105.00 | 0.00  | 0.67 |      |                    |                 |               |
| Distance                 | -102.59 | 2.41  | 0.88 | 0.05 |                    | 0.00 ± 0.00     |               |
| Soil                     | -101.15 | 3.85  | 0.97 | 0.17 | -0.09 ± 0.06       |                 |               |
| Soil + Distance          | -98.45  | 6.55  | 1.00 | 0.22 | -0.09 ± 0.06       | 0.00 ± 0.00     |               |
| Soil × Distance          | -91.73  | 13.27 | 1.00 | 0.25 | -0.04 ± 0.06       | 0.00 ± 0.00     | -0.01 ± 0.00* |
| <b>Potassium (%)</b>     |         |       |      |      |                    |                 |               |
| <i>Distance</i>          | 93.64   | 0.00  | 0.74 | 0.15 |                    | -0.06 ± 0.01    |               |
| Soil + Distance          | 95.88   | 2.24  | 0.98 | 0.15 | 0.20 ± 0.42        | -0.06 ± 0.01    |               |
| Null                     | 102.49  | 8.85  | 0.99 |      |                    |                 |               |
| Soil × Distance          | 103.76  | 10.12 | 1.00 | 0.15 | 0.30 ± 0.45        | -0.05 ± 0.02    | -0.01 ± 0.02  |
| Soil                     | 104.71  | 11.08 | 1.00 | 0.01 | 0.14 ± 0.42        |                 |               |
| <b>Calcium (%)</b>       |         |       |      |      |                    |                 |               |
| <i>Null</i>              | -41.65  | 0.00  | 0.89 |      |                    |                 |               |
| Soil                     | -37.38  | 4.27  | 1.00 | 0.07 | -0.09 ± 0.09       |                 |               |
| Distance                 | -30.11  | 11.55 | 1.00 | 0.01 |                    | 0.00 ± 0.00     |               |
| Soil + Distance          | -25.77  | 15.88 | 1.00 | 0.08 | -0.10 ± 0.09       | 0.00 ± 0.00     |               |
| Soil × Distance          | -15.52  | 26.13 | 1.00 | 0.08 | -0.06 ± 0.10       | 0.00 ± 0.00     | -0.01 ± 0.01  |
| <b>Iron (mg/kg)</b>      |         |       |      |      |                    |                 |               |
| <i>Distance</i>          | 108.49  | 0.00  | 0.76 | 0.24 |                    | -0.08 ± 0.02    |               |
| Soil + Distance          | 110.91  | 2.41  | 0.99 | 0.24 | -0.14 ± 0.41       | -0.08 ± 0.02    |               |
| Soil × Distance          | 118.32  | 9.83  | 1.00 | 0.24 | -0.02 ± 0.47       | -0.07 ± 0.02    | -0.02 ± 0.03  |
| Null                     | 120.79  | 12.30 | 1.00 |      |                    |                 |               |
| Soil                     | 122.75  | 14.26 | 1.00 | 0.02 | -0.24 ± 0.43       |                 |               |

25 **Table S3.** Generalized linear mixed model results testing for correlations between leaf and soil  
 26 micronutrients. The same model was run for each of five micronutrients (Na, K, Ca, Mg, and Fe)  
 27 with leaf micronutrient concentration as the response variable, soil micronutrient + distance as  
 28 the main effects, and site as a random effect.  $R^2$  is the proportion of variance explained by the  
 29 model. Coefficients ( $\pm$  standard error) are shown for each predictor and model.

30

| <b>Leaf Micronutrient</b> | <b><math>R^2</math></b> | <b>Soil Micronutrient<br/>Coefficient <math>\pm</math> SE</b> | <b>Distance<br/>Coefficient <math>\pm</math> SE</b> |
|---------------------------|-------------------------|---------------------------------------------------------------|-----------------------------------------------------|
| Sodium                    | 0.07                    | 12.19 $\pm$ 11.03                                             | -130.67 $\pm$ 41.12                                 |
| Potassium                 | 0.29                    | < 0.001                                                       | -0.06 $\pm$ 0.01                                    |
| Calcium                   | 0.30                    | < 0.001                                                       | < 0.001                                             |
| Magnesium                 | 0.17                    | < 0.001                                                       | < 0.001                                             |
| Iron                      | 0.11                    | 0.00 $\pm$ 0.01                                               | -52.85 $\pm$ 20.57                                  |

31

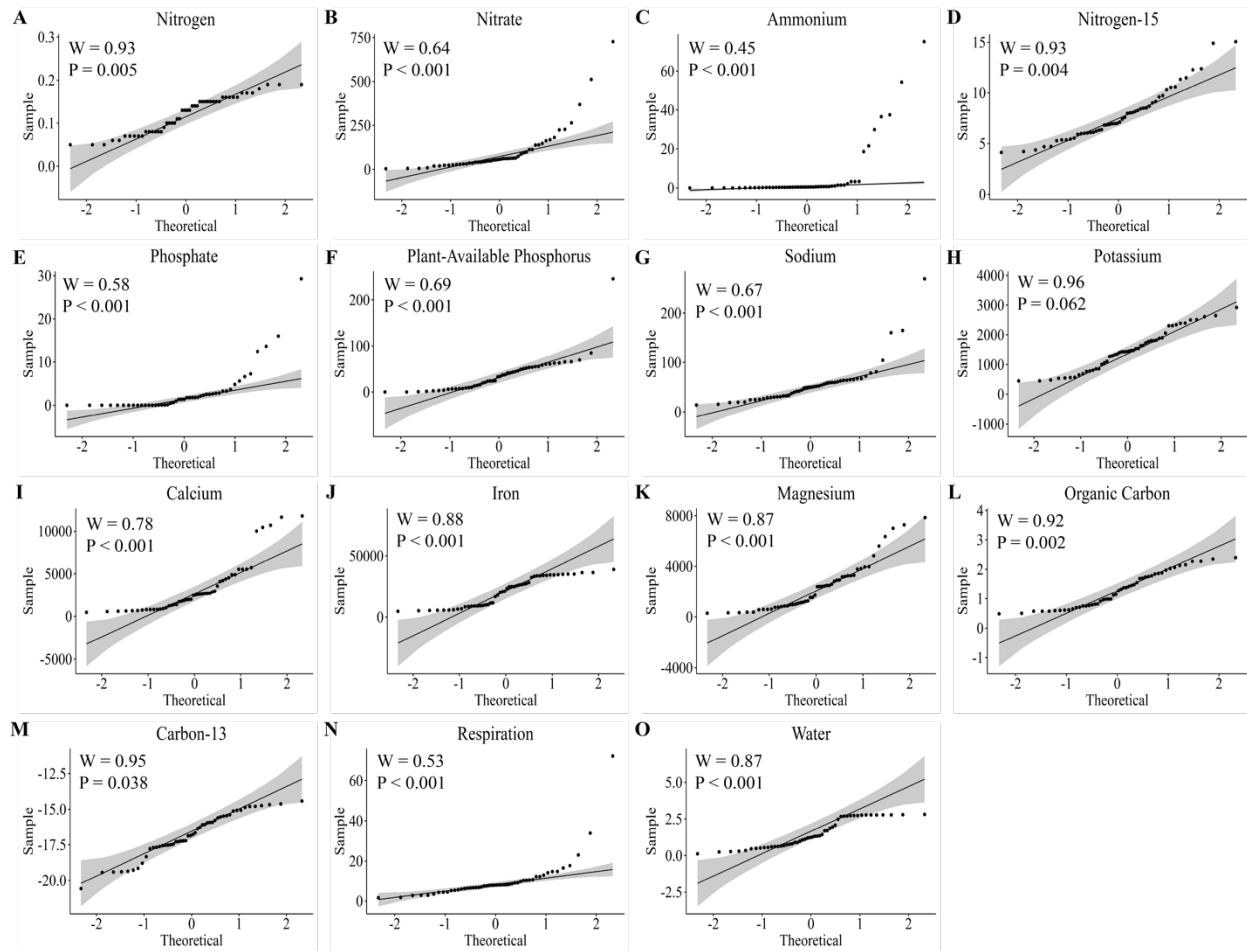

32

33 **Figure S1.** Quantile-quantile plots for soil variables, including results of Shapiro-Wilk normality  
 34 tests.  $W$  is the Shapiro-Wilk statistic. A  $p$ -value  $< 0.050$  indicates that the data are not normally  
 35 distributed.

36

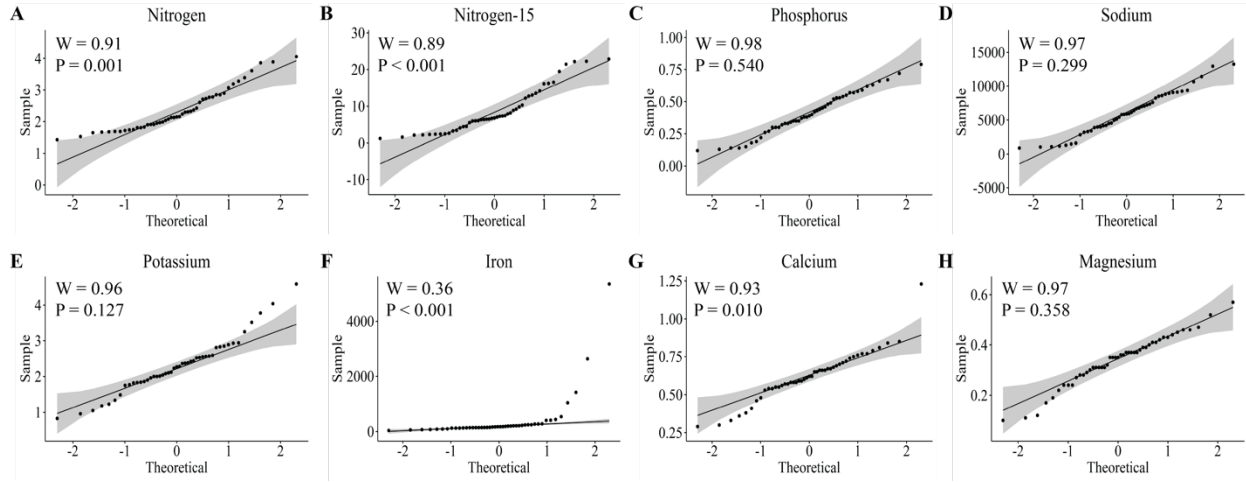

37

38 **Figure S2.** Quantile-quantile plots for leaf variables, including results of Shapiro-Wilk normality  
 39 tests. W is the Shapiro-Wilk statistic. A p-value < 0.050 indicates that the data are not normally  
 40 distributed.



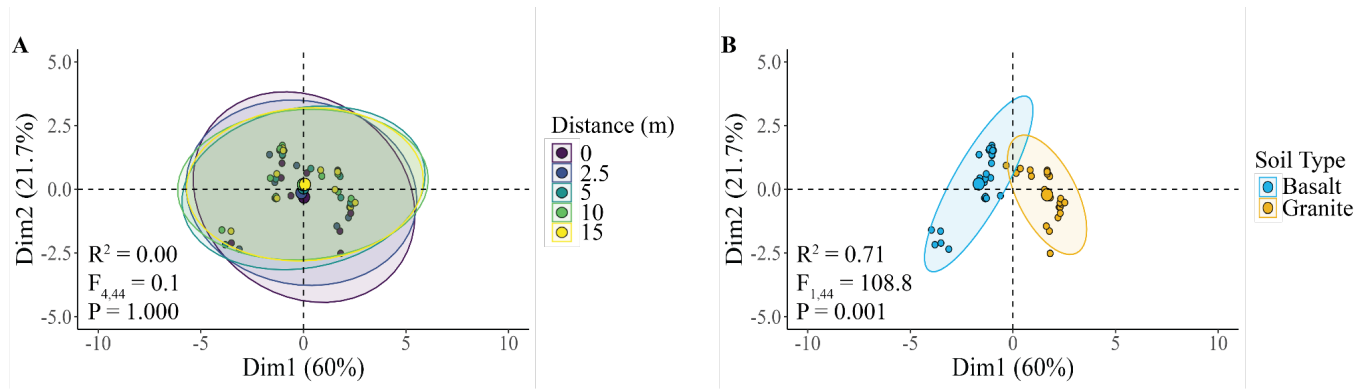

41

42 **Figure S3.** PerMANOVA results for soil micronutrients. (A) Soil micronutrient composition did

43 not differ significantly with distance from the carcass but (B) was distinct in different soil types.

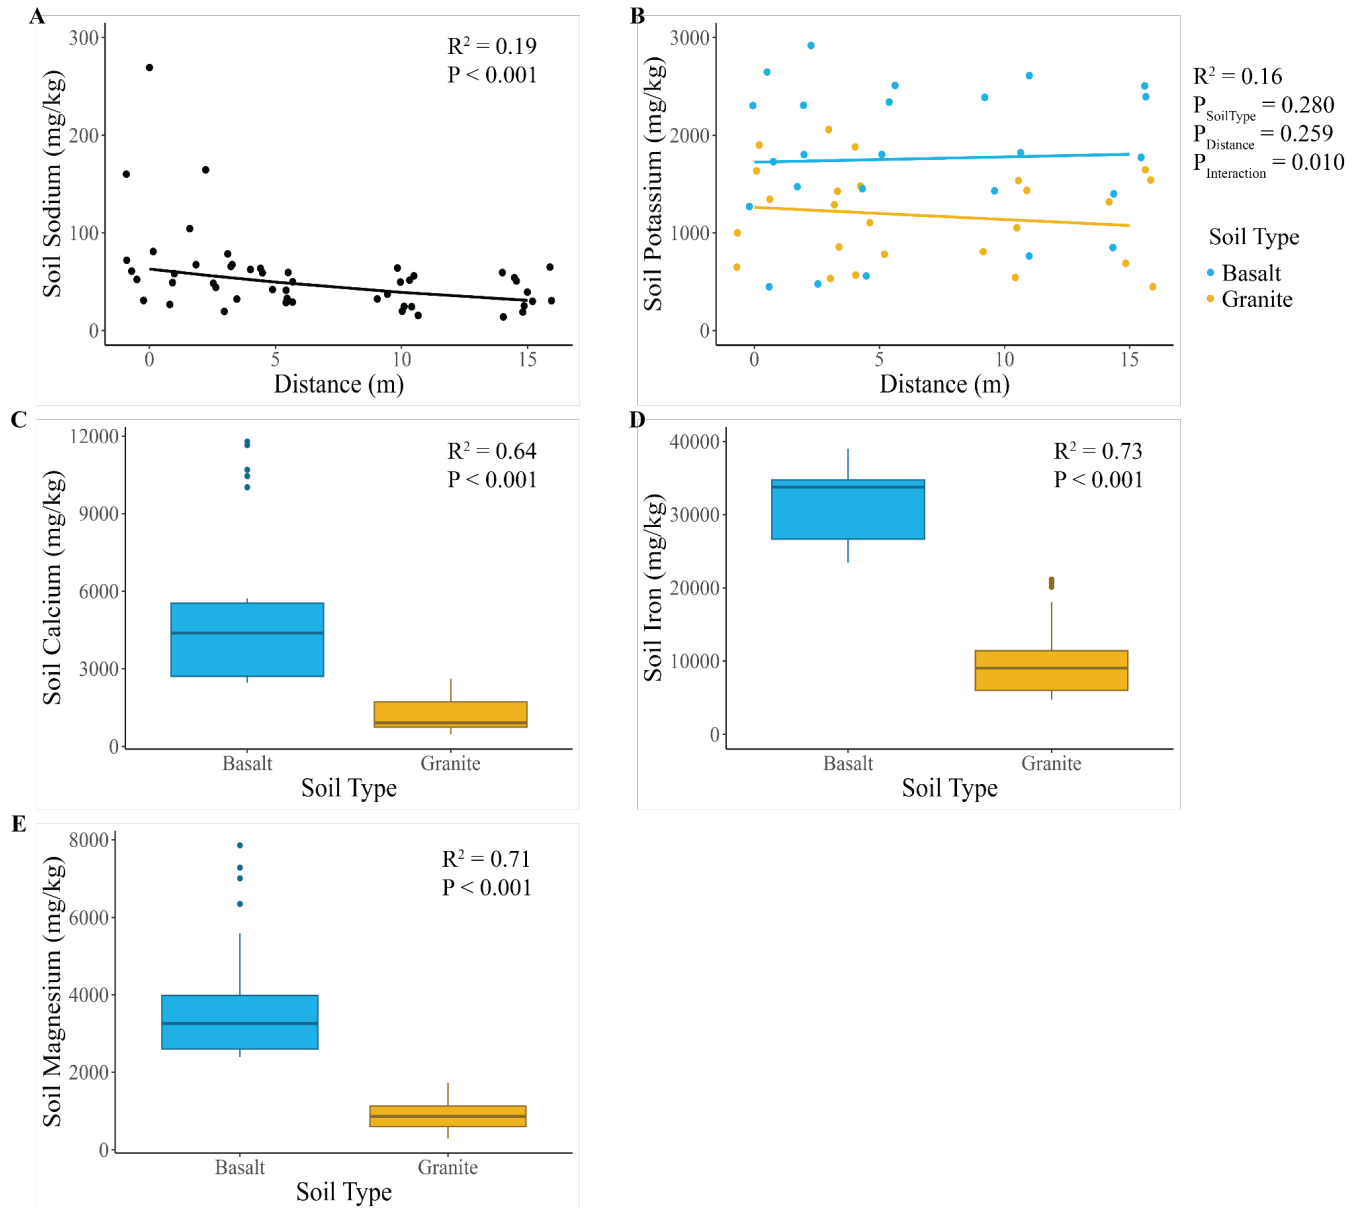

44

45 **Figure S4.** Generalized linear mixed model results for soil micronutrients. (A) Soil sodium  
 46 decreased significantly with distance from the carcass. (B) Potassium decreased with distance  
 47 but only in granitic soils. (C) Calcium, (D) iron, and (E) magnesium were all greater in basaltic  
 48 soils but did not differ significantly with distance from the carcass site. Points represent  
 49 individual measurements and are offset to be visible when they would otherwise overlap.

50

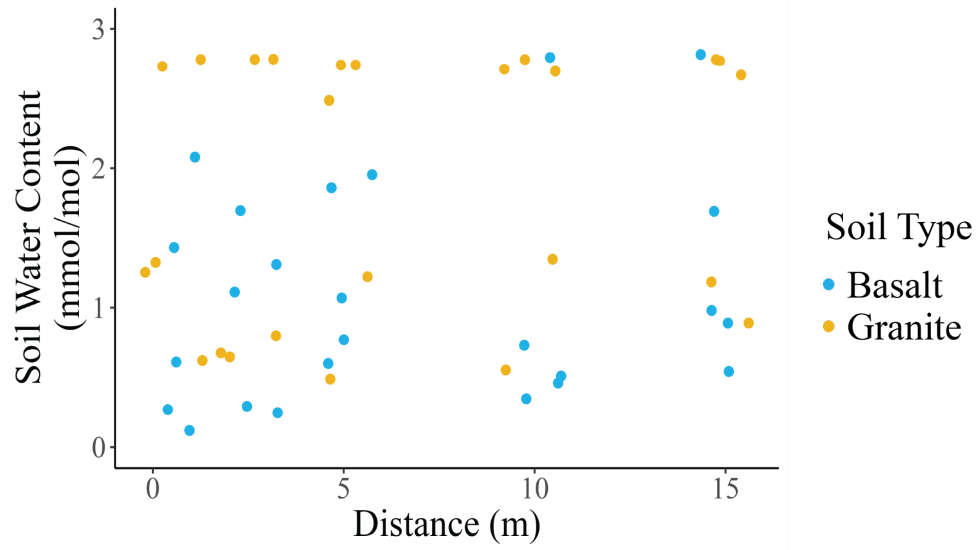

51

52 **Figure S5.** Soil water content was marginally higher in granitic soils. The top models were soil

53 type and the null.

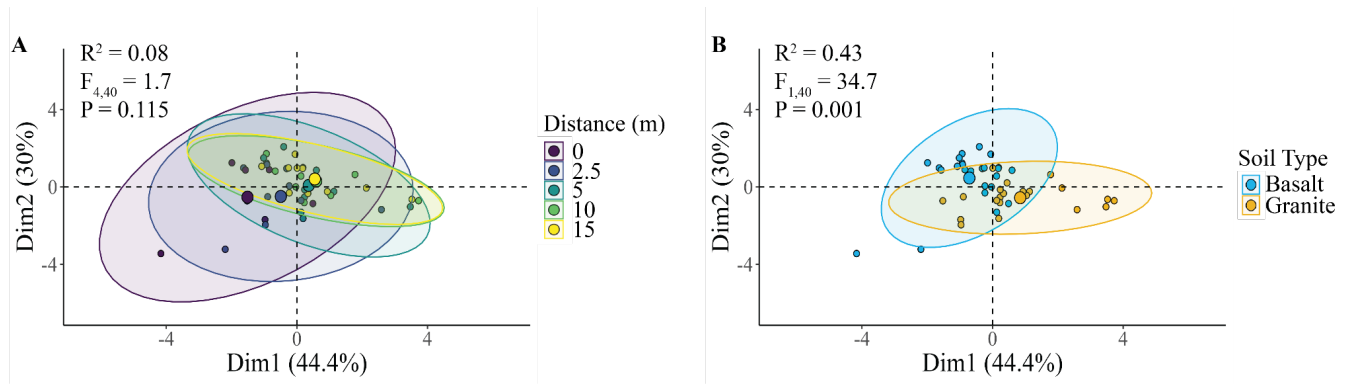

54

55 **Figure S6.** PerMANOVA results for leaf micronutrients. (A) Leaf micronutrient composition did

56 not differ significantly with distance from the carcass but (B) was distinct in different soil types.
